# Supplementary material for: Production of transmitochondrial cybrids containing naturally occurring pathogenic mtDNA variants
Source: PubMed Central journal article supplement — Nucleic Acids Res. 2006 Aug 2;34(13):e95. doi: 10.1093/nar/gkl516 (PMC1540737; doi:10.1093/nar/gkl516), 2006-08-02
Supplement: nar_34_13_e95__1.pdf [file nar_34_13_e95__1.pdf]

## Supplementary material

### Supplementary Figure 1

#### **1.14 is homoplasmic for 5958T>C substitution.**

Primers were designed to produce a 139 bp amplicon encompassing residues 5930-6060 with a primer-determined *Rsa* I restriction site and would produce a second site if the 5958T>C mutation was present. Following a last cycle hot PCR reaction, the product was cleaved with *Rsa* I endonuclease at 37°C overnight. At least 98% of the product was sensitive to *Rsa* I in clone 1.14, whilst the product from donor colon homogenate was only cut at the internal primer site.

### Supplementary Figure 2

#### **In-gel activities of mitochondrial complexes from *transmitochondrial* clones and control lines.**

One hundred micrograms of mitochondrial protein from each of the indicated cell lines was solubilised and subjected to one dimensional BN-PAGE. Following electrophoresis, gels were incubated overnight in 2 mM Tris HCl pH7.4, 0.1 mg/ml NADH, 2.5 mg/ml nitroblue tetrazolium (for complex I activity) or 50 mM KPi pH 7.4, 1 mg/ml reduced cytochrome *c*, 20 µg/ml catalase and 0.5 mg/ml diaminobenzidine (complex IV). Complex I activity produces a blue precipitate (left panel) and complex IV activity generates a brown precipitate. Mitochondria from 143B  $\rho^0$  and 1.12 produce no visible precipitate from either enzyme, consistent with low or absent intramitochondrial translation. Conversely, although 1.14 showed comparable complex I activity to the parental control, only a very faint brown precipitate was noted, indicating a specific defect in complex IV.

### Supplementary Table 1 and 2

#### **Complete sequences of mtDNA present in donor homogenates and all *transmitochondrial* cybrids.**

The mitochondrial genome of DNA isolated from colonic tissue and cybrids was amplified and sequenced as detailed in Materials and Methods. All base substitutions differing from the revised Cambridge Reference Sequence are listed. Substitutions that also differ from the donor tissue homogenate are highlighted for each cybrid. Donor 1 is a member of haplogroup T2, donor 2 is haplogroup H2.

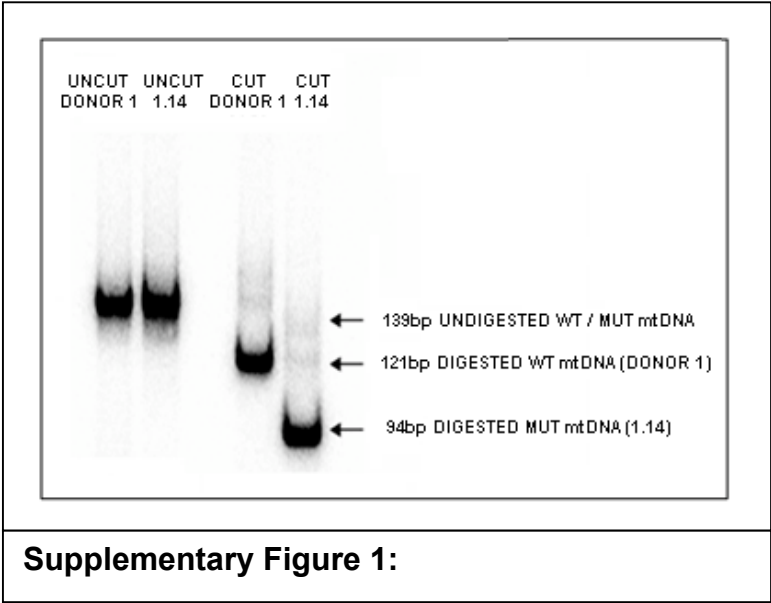

Supplementary Figure 1:

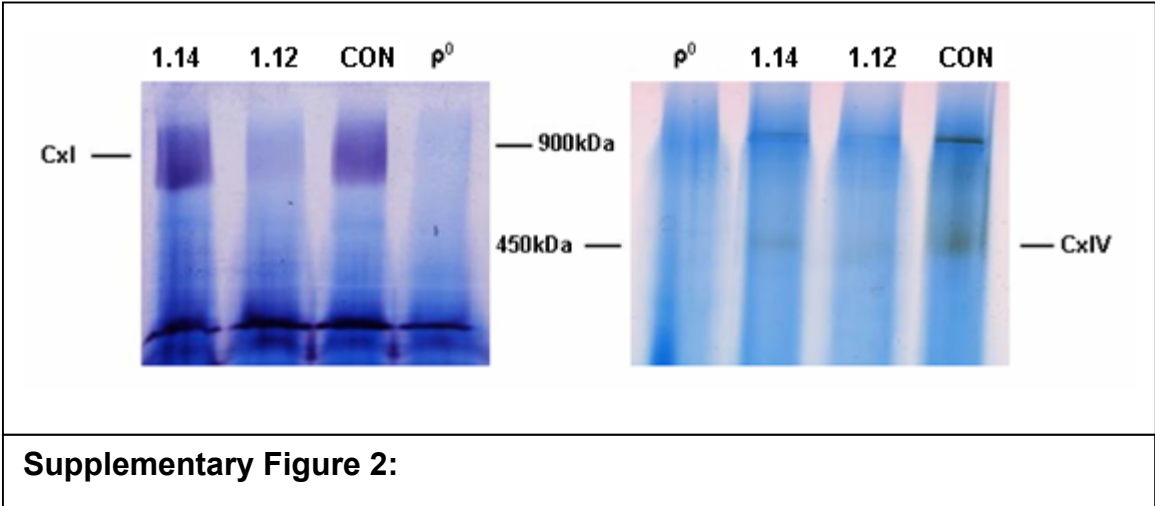

Supplementary Figure 2:

| BASE SUBSTITUTION                        | DONOR 1 | 1.12 | 1.14 | CHARACTERISATION (GENE PRODUCT, AA CHANGE) |
|------------------------------------------|---------|------|------|--------------------------------------------|
| 750 A>G                                  | +       | +    | +    | Polymorphism                               |
| 1411 G>A                                 | -       | +    | -    | 12S rRNA                                   |
| 1438 A>G                                 | +       | +    | +    | Polymorphism                               |
| 1888 G>A                                 | +       | +    | +    | Polymorphism                               |
| 1758 T>C                                 | -       | +    | -    | 16S rRNA                                   |
| 2706 A>G                                 | +       | +    | +    | Polymorphism                               |
| 3039 T>C                                 | -       | +    | -    | 16S rRNA                                   |
| 3107Cdel                                 | +       | +    | +    | Polymorphism                               |
| 4216 T>C                                 | +       | +    | +    | Polymorphism                               |
| 4769 A>G                                 | +       | +    | +    | Polymorphism                               |
| 4917 A>G                                 | +       | +    | +    | Polymorphism                               |
| 5277 T>C                                 | +       | +    | +    | Polymorphism                               |
| 5426 T>C                                 | +       | +    | +    | Polymorphism                               |
| 5958 T>C                                 | -       | -    | +    | COX1 (Y19H)                                |
| 6489 C>A                                 | +       | +    | +    | Polymorphism                               |
| 7028 C>T                                 | +       | +    | +    | Polymorphism                               |
| 8270 C>T                                 | +       | +    | +    | Polymorphism                               |
| 9bp deletion<br>8269→8279<br>(CACCCCCTC) | +       | +    | +    | Polymorphism                               |
| 8697 G>A                                 | +       | +    | +    | Polymorphism                               |
| 8860 A>G                                 | +       | +    | +    | Polymorphism                               |
| 10463 T>C                                | +       | +    | +    | Polymorphism                               |
| 11251 A>G                                | +       | +    | +    | Polymorphism                               |
| 11719 G>A                                | +       | +    | +    | Polymorphism                               |
| 11812 A>G                                | +       | +    | +    | Polymorphism                               |
| 13368 G>A                                | +       | +    | +    | Polymorphism                               |
| 14233 A>G                                | +       | +    | +    | Polymorphism                               |
| 14766 C>T                                | +       | +    | +    | Polymorphism                               |
| 14905 G>A                                | +       | +    | +    | Polymorphism                               |
| 15028 C>A                                | +       | +    | +    | Polymorphism                               |
| 15043 G>A                                | +       | +    | +    | Polymorphism                               |
| 15326 A>G                                | +       | +    | +    | Polymorphism                               |
| 15452 C>A                                | +       | +    | +    | Polymorphism                               |
| 15607 A>G                                | +       | +    | +    | Polymorphism                               |
| 15928 G>A                                | +       | +    | +    | Polymorphism                               |
| 16126 T>C                                | +       | +    | +    | Polymorphism                               |
| 16294 C>T                                | +       | +    | +    | Polymorphism                               |
| 16296 C>T                                | +       | +    | +    | Polymorphism                               |
| 16298 T>C                                | +       | +    | +    | Polymorphism                               |
| 16519 T>C                                | +       | +    | +    | Polymorphism                               |
| 73 A>G                                   | +       | +    | +    | Polymorphism                               |
| 195 T>C                                  | +       | +    | +    | Polymorphism                               |
| 263 A>G                                  | +       | +    | +    | Polymorphism                               |
| 310Cins                                  | +       | +    | +    | Polymorphism                               |
| 312Cins                                  | +       | +    | +    | Polymorphism                               |
| 709 G>A                                  | +       | +    | +    | Polymorphism                               |

| BASE SUBSTITUTION     | DONOR 2 | 2.3 | 2.7 | 2.10 | 2.12 | 2.17 | 2.19 | CHARACTERISATION (GENE PRODUCT, AA CHANGE) |
|-----------------------|---------|-----|-----|------|------|------|------|--------------------------------------------|
| 750 A>G               | +       | +   | +   | +    | +    | +    | +    | Polymorphism                               |
| 1438 A>G              | +       | +   | +   | +    | +    | +    | +    | Polymorphism                               |
| 1888 G>A              | +       | +   | +   | +    | +    | +    | +    | Polymorphism                               |
| 2141 T>C              | +       | +   | +   | +    | +    | +    | +    | Polymorphism                               |
| 2706 A>G              | +       | +   | +   | +    | +    | +    | +    | Polymorphism                               |
| <b>2943 G&gt;A</b>    | -       | -   | +   | -    | -    | -    | -    | <b>16S rRNA</b>                            |
| 3107Cdel              | +       | +   | +   | +    | +    | +    | +    | Polymorphism                               |
| 4216 T>C              | +       | +   | +   | +    | +    | +    | +    | Polymorphism                               |
| <b>4647 T&gt;C</b>    | -       | -   | -   | -    | -    | -    | +    | <b>ND2 gene (F60L)</b>                     |
| 4769 A>G              | +       | +   | +   | +    | +    | +    | +    | Polymorphism                               |
| 4917 A>G              | +       | +   | +   | +    | +    | +    | +    | Polymorphism                               |
| <b>5458 T&gt;C *</b>  | -       | -   | -   | -    | -    | +    | -    | <b>ND2 gene (I330T)</b>                    |
| 7028 C>T              | +       | +   | +   | +    | +    | +    | +    | Polymorphism                               |
| 7802 C>T              | +       | +   | +   | +    | +    | +    | +    | Polymorphism                               |
| 8697 G>A              | +       | +   | +   | +    | +    | +    | +    | Polymorphism                               |
| 8860 A>G              | +       | +   | +   | +    | +    | +    | +    | Polymorphism                               |
| 9117 T>C              | +       | +   | +   | +    | +    | +    | +    | Polymorphism                               |
| 10463 T>C             | +       | +   | +   | +    | +    | +    | +    | Polymorphism                               |
| <b>11055 T&gt;A *</b> | -       | +   | -   | -    | -    | -    | -    | <b>ND4 gene (L99Q)</b>                     |
| 11251 A>G             | +       | +   | +   | +    | +    | +    | +    | Polymorphism                               |
| 11719 G>A             | +       | +   | +   | +    | +    | +    | +    | Polymorphism                               |
| 11812 A>G             | +       | +   | +   | +    | +    | +    | +    | Polymorphism                               |
| 13368 G>A             | +       | +   | +   | +    | +    | +    | +    | Polymorphism                               |
| 13965 T>C             | +       | +   | +   | +    | +    | +    | +    | Polymorphism                               |
| 13966 A>G             | +       | +   | +   | +    | +    | +    | +    | Polymorphism                               |
| 14233 A>G             | +       | +   | +   | +    | +    | +    | +    | Polymorphism                               |
| <b>14361 A&gt;G *</b> | -       | -   | -   | -    | +    | -    | -    | <b>ND6 gene (W103R)</b>                    |
| 14687 A>G             | +       | +   | +   | +    | +    | +    | +    | Polymorphism                               |
| 14766 C>T             | +       | +   | +   | +    | +    | +    | +    | Polymorphism                               |
| 14905 G>A             | +       | +   | +   | +    | +    | +    | +    | Polymorphism                               |
| 15326 A>G             | +       | +   | +   | +    | +    | +    | +    | Polymorphism                               |
| 15452 C>A             | +       | +   | +   | +    | +    | +    | +    | Polymorphism                               |
| 15607 A>G             | +       | +   | +   | +    | +    | +    | +    | Polymorphism                               |
| 15928 G>A             | +       | +   | +   | +    | +    | +    | +    | Polymorphism                               |
| 16126 T>C             | +       | +   | +   | +    | +    | +    | +    | Polymorphism                               |
| 16294 C>T             | +       | +   | +   | +    | +    | +    | +    | Polymorphism                               |
| 16296 C>T             | +       | +   | +   | +    | +    | +    | +    | Polymorphism                               |
| 16324 T>C             | +       | +   | +   | +    | +    | +    | +    | Polymorphism                               |
| 16519 T>C             | +       | +   | +   | +    | +    | +    | +    | Polymorphism                               |
| 73 A>G                | +       | +   | +   | +    | +    | +    | +    | Polymorphism                               |
| 263 A>G               | +       | +   | +   | +    | +    | +    | +    | Polymorphism                               |
| <b>315Cins</b>        | +       | +   | +   | +    | +    | -    | +    | Polymorphism                               |
| 709 G>A               | +       | +   | +   | +    | +    | +    | +    | Polymorphism                               |

Supplementary table 2:
